# Supplementary material
Source: PubMed Central journal article supplement (PMC7334099)
Supplement: NIHMS1582183-supplement-1.pdf [file NIHMS1582183-supplement-1.pdf]

**A**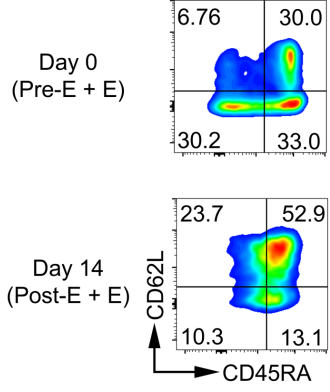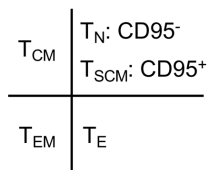**B**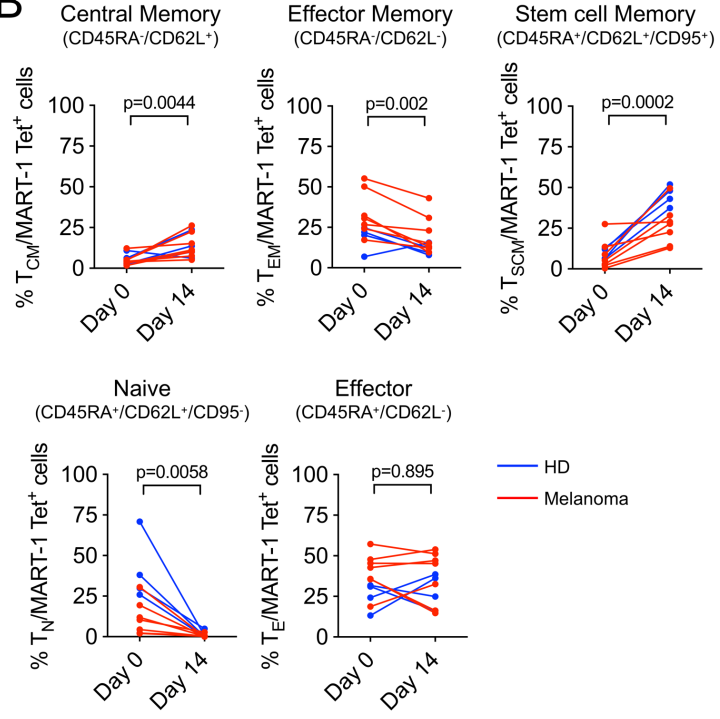**C**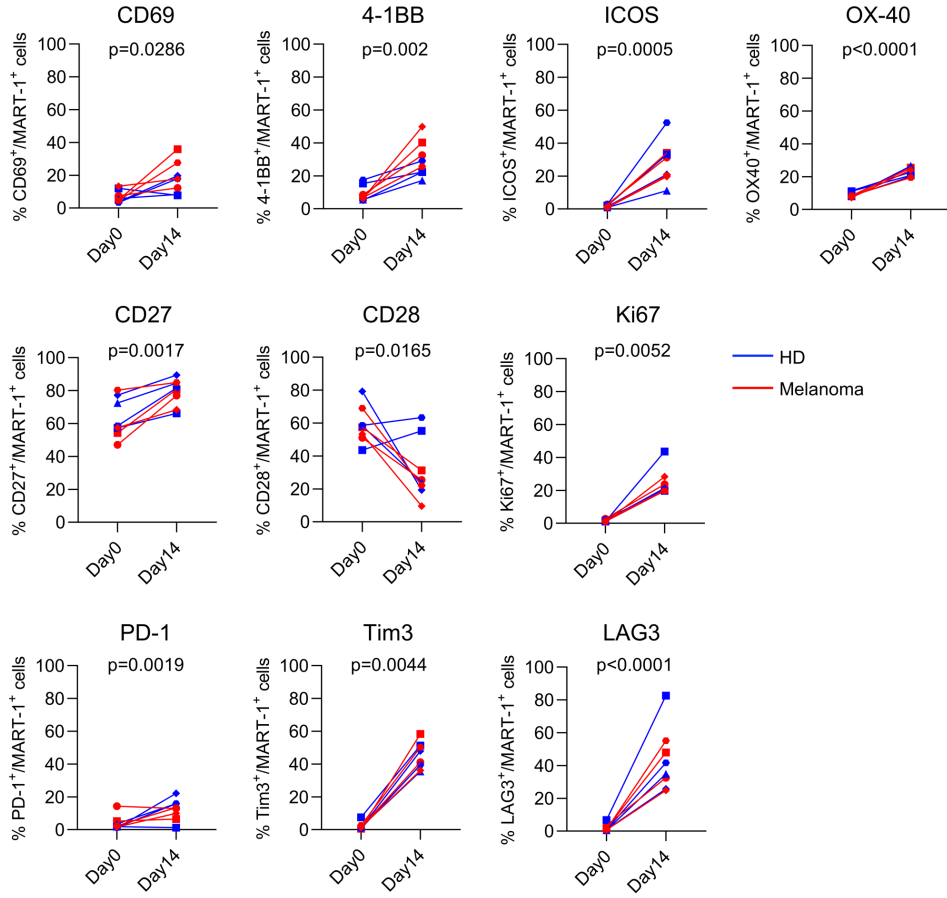

**Figure S1. Analysis of phenotype, activation, maturation and checkpoint markers on E + E MART-1 Tet<sup>+</sup> CD8<sup>+</sup> T-cells.**

(A) Representative staining of MART-1 Tet<sup>+</sup> CD8<sup>+</sup> T-cells for CD45RA, CD62L (L-selectin) and CD95 at day 0 and day 14. (B) Summary of phenotypes on MART-1 Tet<sup>+</sup> CD8<sup>+</sup> T-cells expanded by nano-aAPC from 4 healthy donors (blue) and 7 melanoma patients (red). (C) Expression of activation markers (CD69, 4-1BB, ICOS and OX-40), maturity markers (CD27 and CD28), proliferation (Ki67) and checkpoint molecules (PD-1, Tim3 and LAG3) on MART-1 Tet<sup>+</sup> CD8<sup>+</sup> T-cells from 4 healthy donors (blue) and 4 melanoma patients (red). Significance was assessed by Student's two-tailed paired *t* test.
