# Supplementary material
Source: PubMed Central journal article supplement (PMC7334099)
Supplement: NIHMS1582183-supplement-2.pdf [file NIHMS1582183-supplement-2.pdf]

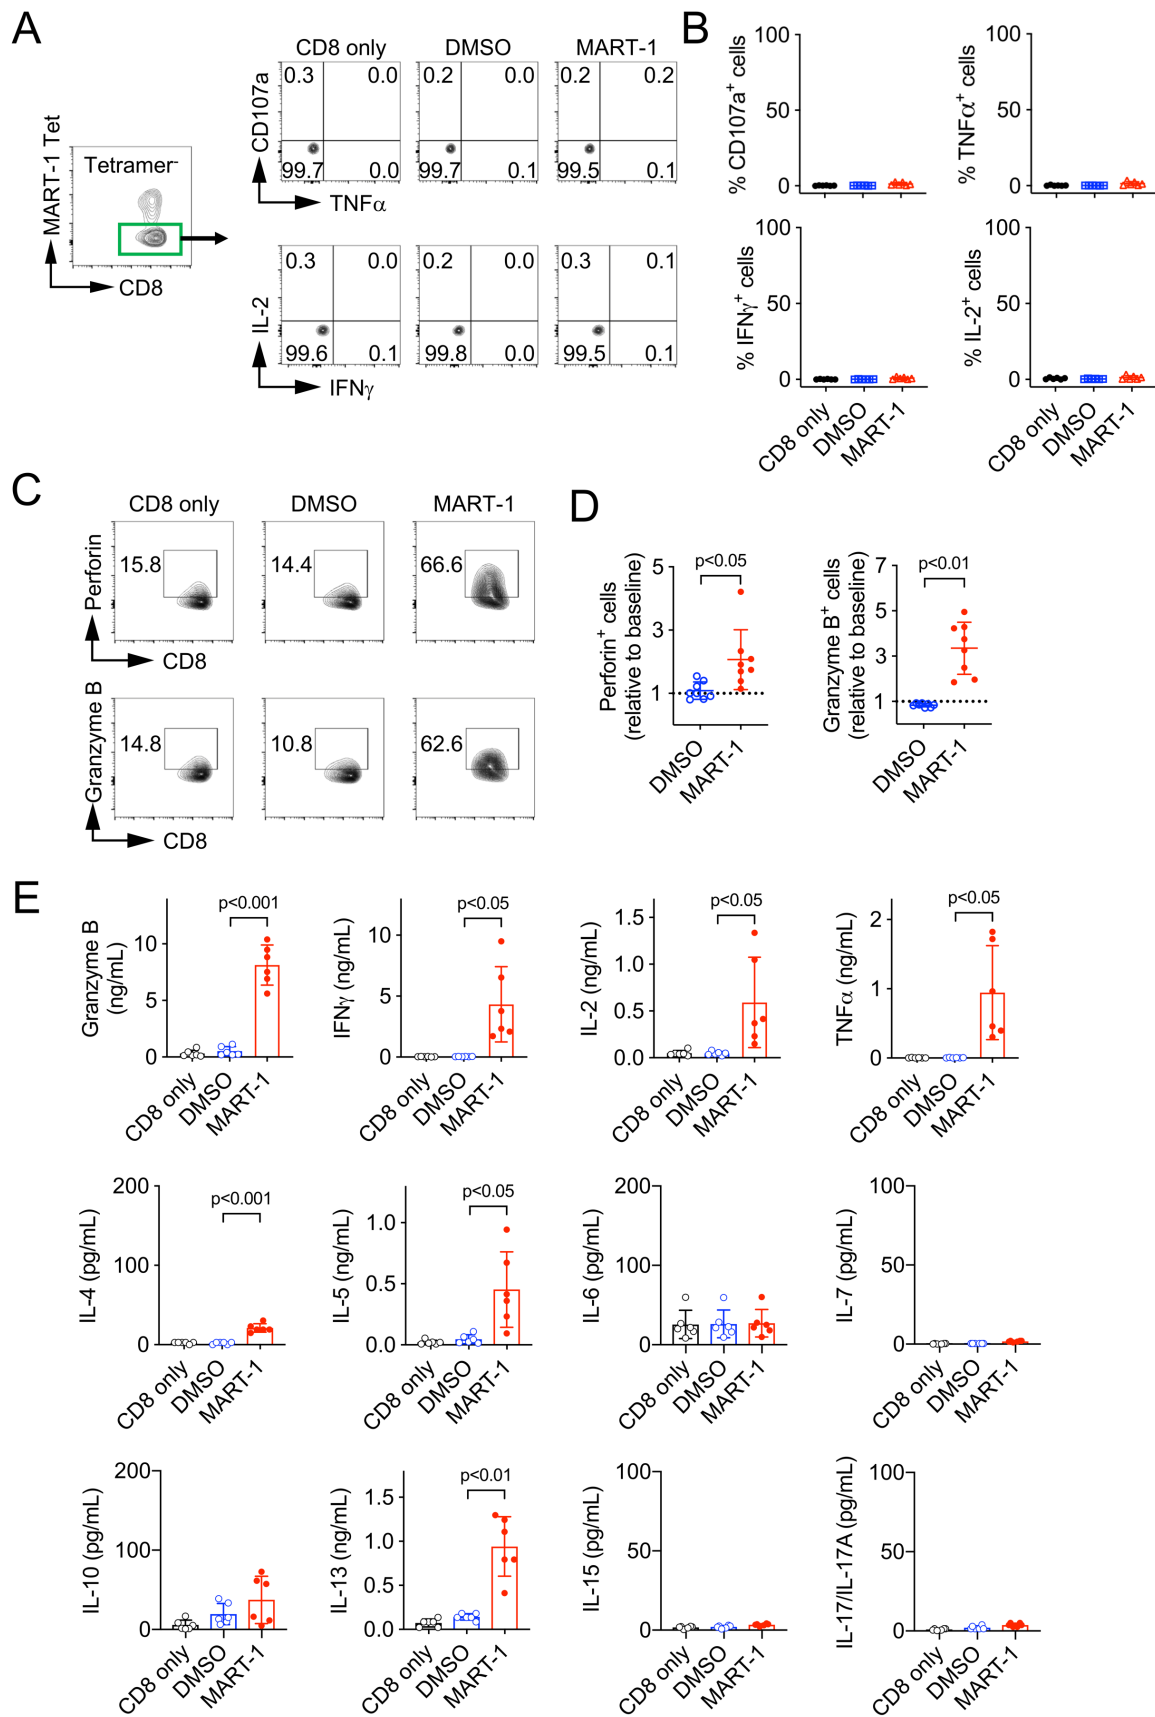

**Figure S2. Cytokine analysis of MART-1 Tet<sup>+</sup> CD8<sup>+</sup> T-cells.**

(A) Representative staining pattern of MART-1 Tet negative CD8<sup>+</sup> T-cells for CD107a and indicated cytokines. The expanded CD8<sup>+</sup> T-cells were co-cultured with T2 cells which were pulsed with the MART-1<sub>126-35</sub> A27L peptide. (B) Summary of expression of CD107a, TNF $\alpha$ , IFN $\gamma$  and IL-2 of MART-1 Tet<sup>-</sup> CD8<sup>+</sup> T-cells from 6 melanoma patients. (C) Representative staining pattern of MART-1 Tet<sup>+</sup> CD8<sup>+</sup> T-cells for perforin and Granzyme B. The nano-aAPC expanded CD8<sup>+</sup> T-cells were co-cultured with T2 cells which were pulsed with the MART-1<sub>126-35</sub> A27L peptide. (D) Summary of perforin and Granzyme B expression from T cells of 8 melanoma patients. (E) The production of indicated cytokines of T cells from 6 patients were shown. The cells were co-cultured with MART-1<sub>126-35</sub> A27L peptide-loaded T2 cells for 24 hours. Supernatants were harvested and analyzed using a Luminex kit. Error bars indicate mean  $\pm$  SD. Significance was assessed by Student's two-tailed paired *t* test.
