# Supplementary material
Source: PubMed Central journal article supplement (PMC7334099)
Supplement: NIHMS1582183-supplement-3.pdf [file NIHMS1582183-supplement-3.pdf]

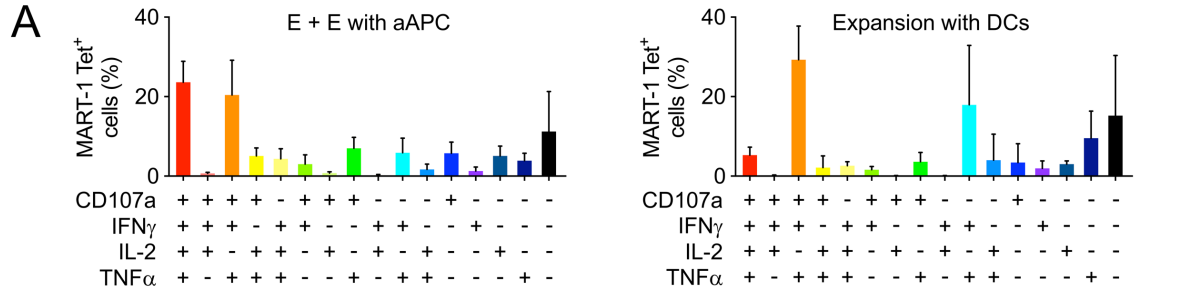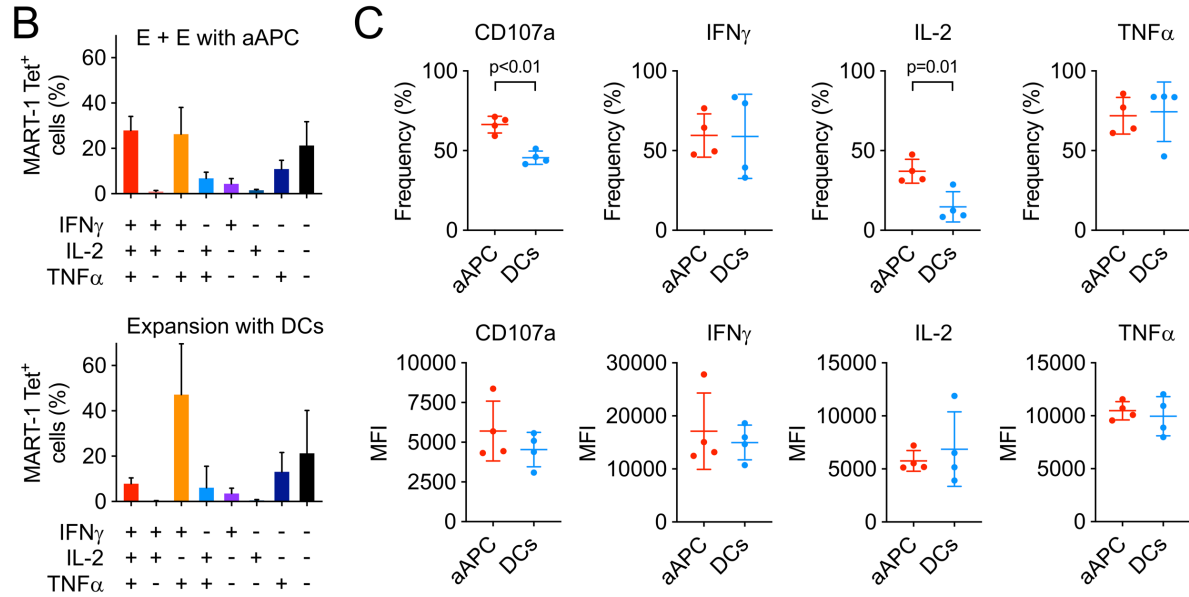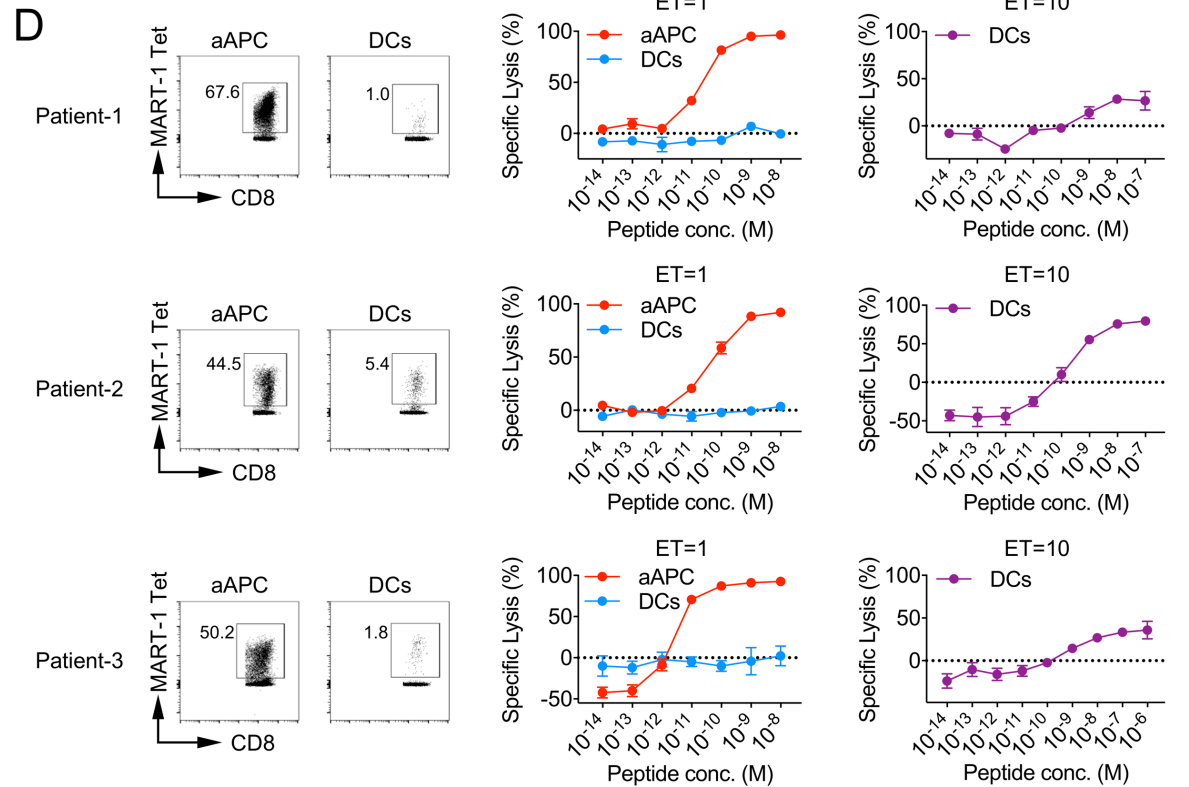

**Figure S3. Polyfunctional analysis of MART-1 Tet<sup>+</sup> CD8<sup>+</sup> T-cells expanded by nano-aAPC or DCs.**

(A and B) All combinations of responses corresponding to 4 melanoma patients were assessed. Responses of four (A) and three functions (B) of MART-1 Tet<sup>+</sup> CD8<sup>+</sup> T-cells were shown. (C) Summary of expression of CD107a, TNF $\alpha$ , IFN $\gamma$  and IL-2 from the same melanoma patients (n=4). (D) Representative staining patterns of MART-1 Tet<sup>+</sup> CD8<sup>+</sup> T-cells expanded by nano-aAPC or DCs from the same melanoma patients. Specific lysis of MART-1 Tet<sup>+</sup> CD8<sup>+</sup> T-cells expanded by nano-aAPC (red) or DCs (blue) from the same melanoma patients at ET=1. Specific lysis of MART-1 Tet<sup>+</sup> CD8<sup>+</sup> T-cells expanded by DCs from the same melanoma patients at ET=10. Error bars indicate mean  $\pm$  SD. Significance was assessed by Student's two-tailed *t* test.
