# Supplementary material
Source: PubMed Central journal article supplement (PMC7334099)
Supplement: NIHMS1582183-supplement-4.pdf [file NIHMS1582183-supplement-4.pdf]

### A T2 stabilization assay

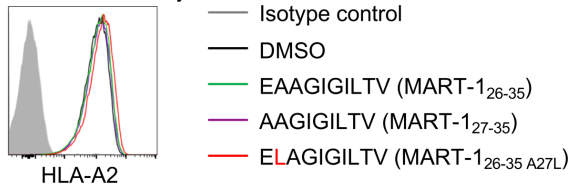

### B

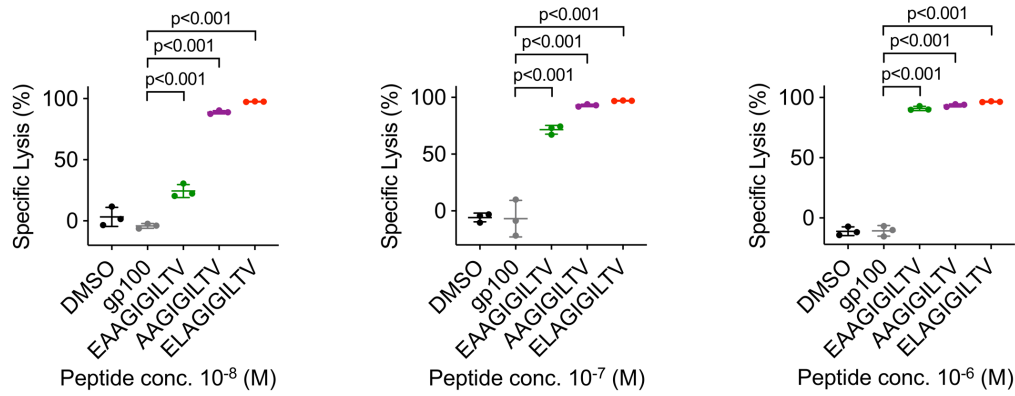

### C

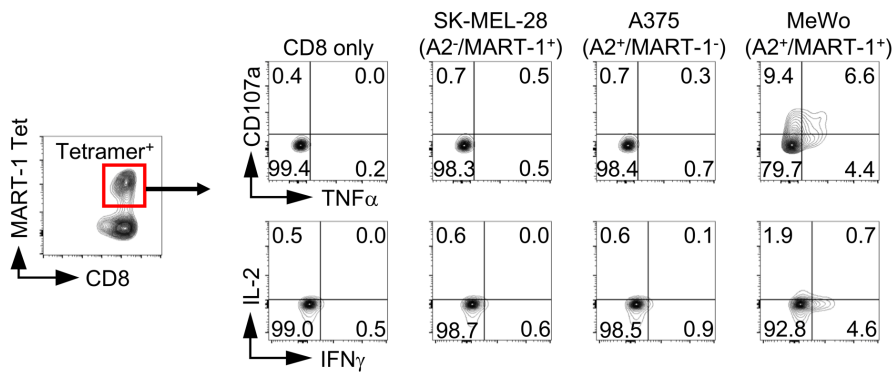

### D

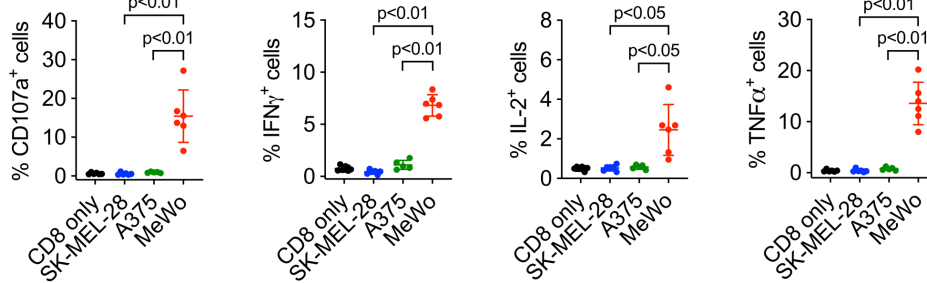

### E

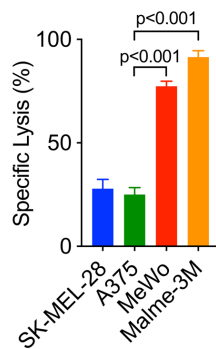

**Figure S4. Functional analysis of MART-1 Tet<sup>+</sup> CD8<sup>+</sup> T-cells against melanoma cell lines.**

(A) HLA stabilization assay with T2 cells. MART-1 peptides (MART-1<sub>26-35</sub>; EAAGIGILTV, MART-1<sub>27-35</sub>; AAGIGILTV, MART-1<sub>26-35</sub> A27L; ELAGIGILTV) were loaded on T2 cells and expression levels of HLA-A2 were analyzed. (B) Cytotoxic activity of MART-1 Tet<sup>+</sup> CD8<sup>+</sup> T-cells against peptide-loaded T2 cells at various peptide concentrations. Data represent mean  $\pm$  SD of three experiment replicates and are representative from 3 melanoma patients. Significance was assessed by Student's two-tailed *t* test. (C) Representative staining pattern of MART-1 Tet<sup>+</sup> CD8<sup>+</sup> T-cells for CD107a and indicated cytokines. The expanded CD8<sup>+</sup> T-cells were co-cultured with SK-MEL-28, A375 and MeWo cells. (D) Summary of expression of CD107a, TNF $\alpha$ , IFN $\gamma$  and IL-2 from melanoma patients' T cells (n=5-6). Significance was assessed by Student's two-tailed paired *t* test. (E) Summary of the cytotoxic activity at E:T ratio of 10:1. Significance was assessed by one-way ANOVA and Tukey's multiple comparisons post-hoc test. Error bars indicate mean  $\pm$  SD.
