# Supplementary material
Source: PubMed Central journal article supplement (PMC7334099)
Supplement: NIHMS1582183-supplement-5.pdf [file NIHMS1582183-supplement-5.pdf]

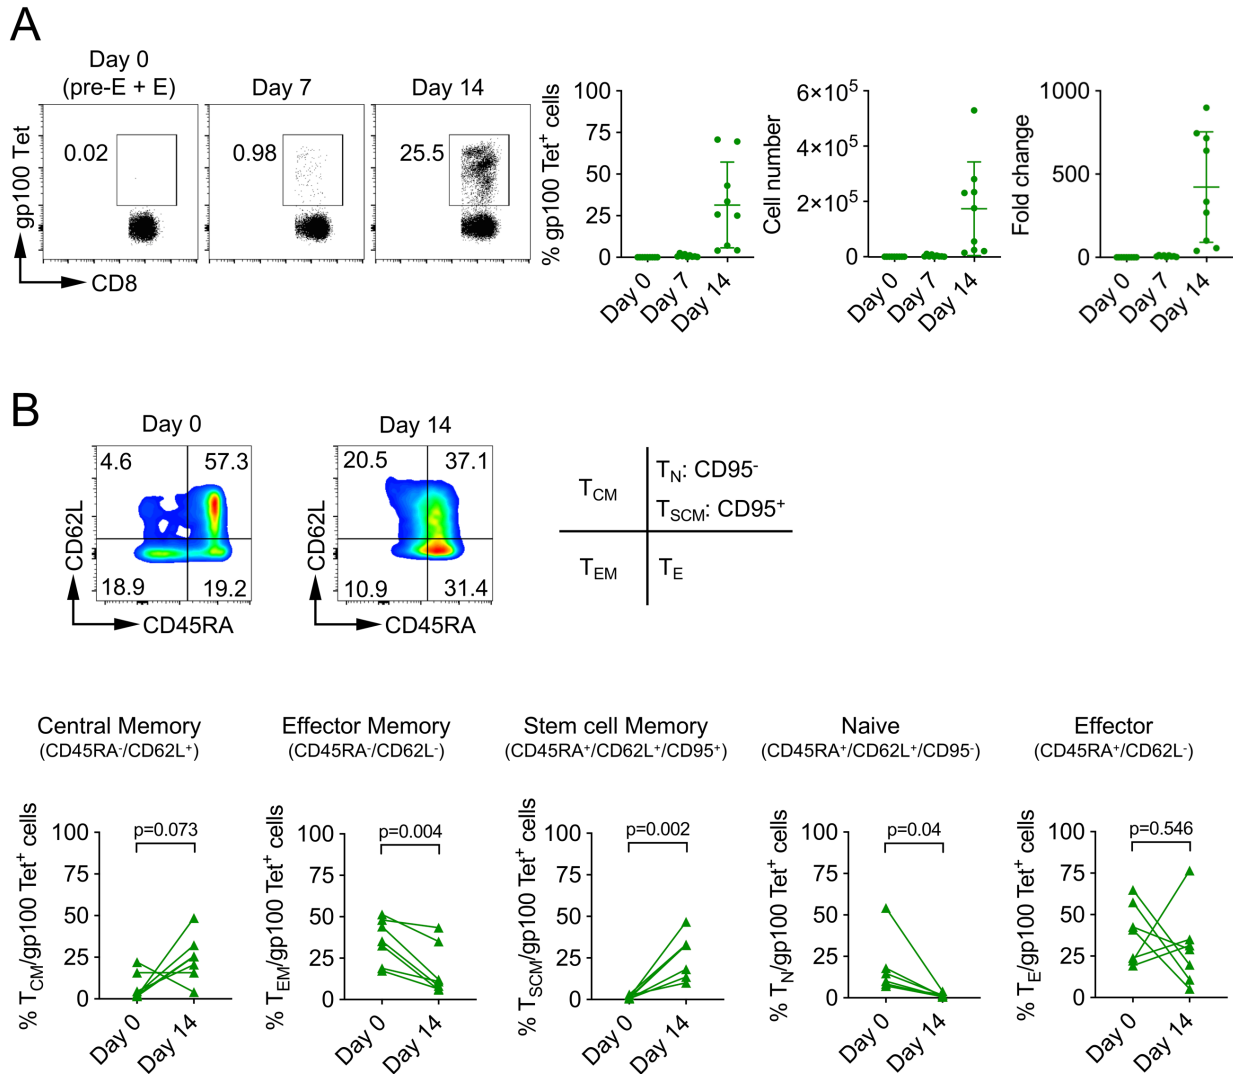

**Figure S5. Nano-aAPC expanded CD8<sup>+</sup> T-cells targeting gp100.**

(A) Detection of gp100-specific CD8<sup>+</sup> T-cells from a melanoma patient by staining with gp100/HLA-A\*0201 tetramers. Summary of frequency, cell number and fold change of gp100 Tet<sup>+</sup> CD8<sup>+</sup> T-cells from 9 melanoma patients. (B) Phenotypic analysis of gp100 Tet<sup>+</sup> CD8<sup>+</sup> T-cells from 7 melanoma patients. Significance was assessed by Student's two-tailed paired *t* test.
