# Supplementary material
Source: PubMed Central journal article supplement (PMC7334099)
Supplement: NIHMS1582183-supplement-6.pdf [file NIHMS1582183-supplement-6.pdf]

**A**

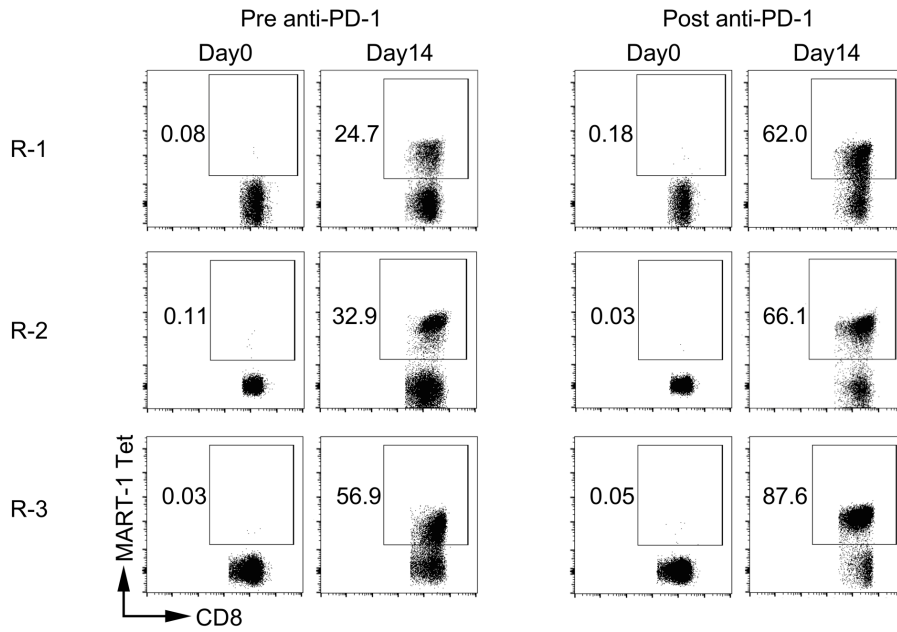

**B**

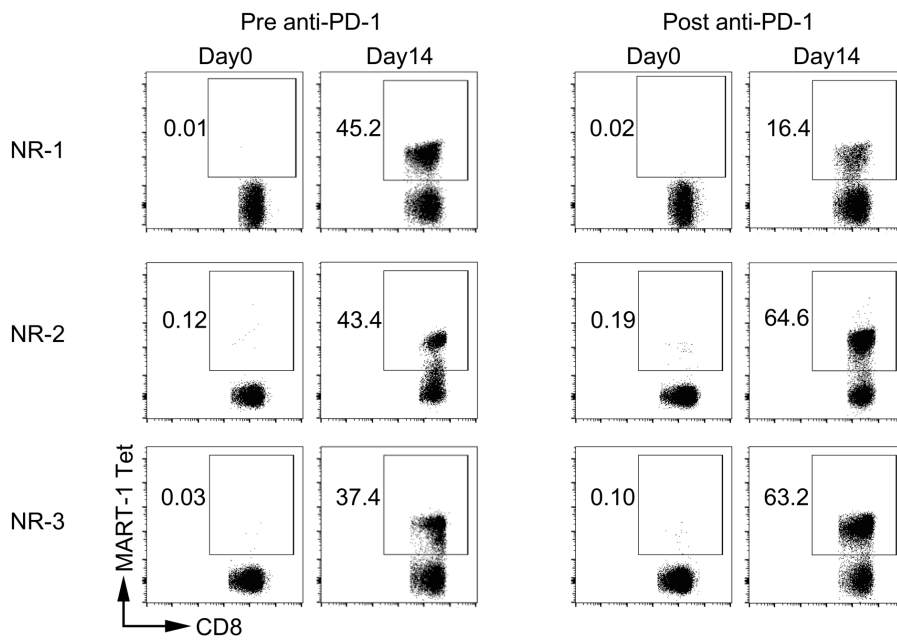

**C**

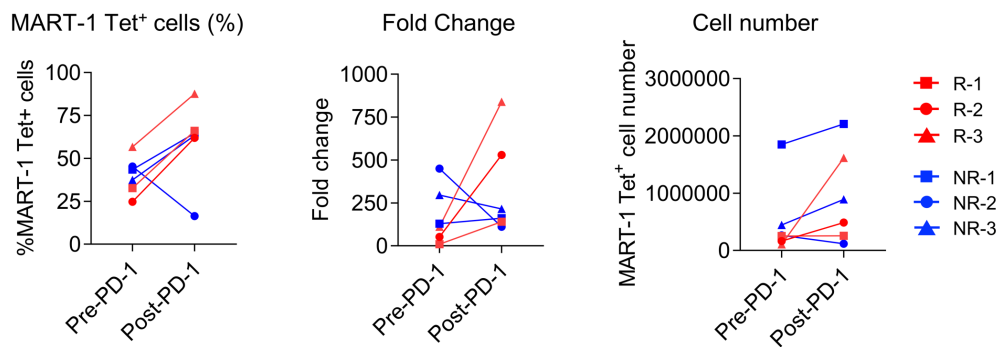

**Figure S6. Nano-aAPC expanded MART-1 Tet<sup>+</sup> cells from patients pre- and post-PD-1 treatment.**

(A and B) Expanded MART-1 Tet<sup>+</sup> CD8<sup>+</sup> T-cells from patients who were treated with nivolumab. (C) Frequency, fold change and cell number of MART-1 Tet<sup>+</sup> cells expanded by nano-aAPC at day 14 from 6 patients who have paired pre- and post-anti-PD-1 samples. These patients included 3 responders (R) and 3 non-responders (NR) to PD-1 blockade.
