# Supplementary material
Source: PubMed Central journal article supplement (PMC7334099)
Supplement: NIHMS1582183-supplement-7.pdf [file NIHMS1582183-supplement-7.pdf]

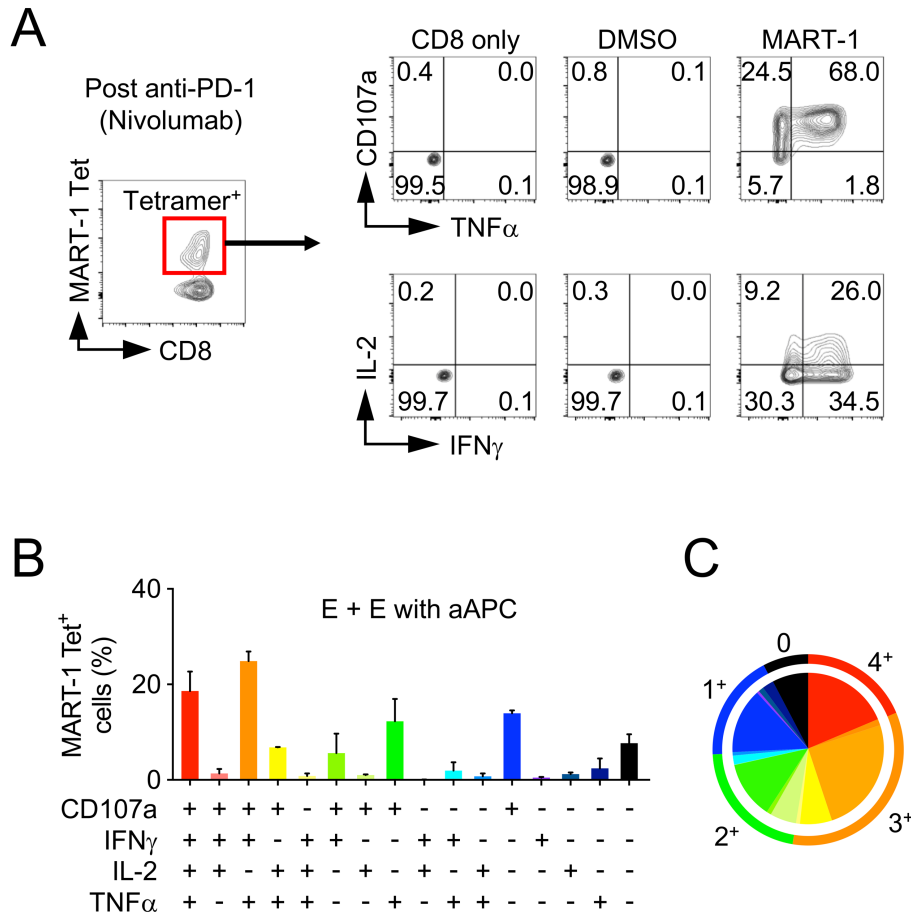

**Figure S7. Functional analysis of nano-aAPC expanded MART-1 Tet<sup>+</sup> CD8<sup>+</sup> T-cells post-PD-1 treatment.**

(A) Representative staining of MART-1 Tet<sup>+</sup> CD8<sup>+</sup> T-cells for CD107a, TNF $\alpha$ , IFN $\gamma$  and IL-2 cytokines from 2 patients who were treated with nivolumab. The expanded CD8<sup>+</sup> T-cells were co-cultured with T2 cells which were pulsed with the MART-1<sub>26-35</sub> A27L peptide. (B) Polyfunctional analysis of MART-1 Tet<sup>+</sup> CD8<sup>+</sup> T-cells. All combinations of responses were shown. (C) The data were summarized in a pie chart. Error bars indicate mean  $\pm$  SD.
