# Supplementary material
Source: PubMed Central journal article supplement (PMC7334099)
Supplement: NIHMS1582183-supplement-8.pdf [file NIHMS1582183-supplement-8.pdf]

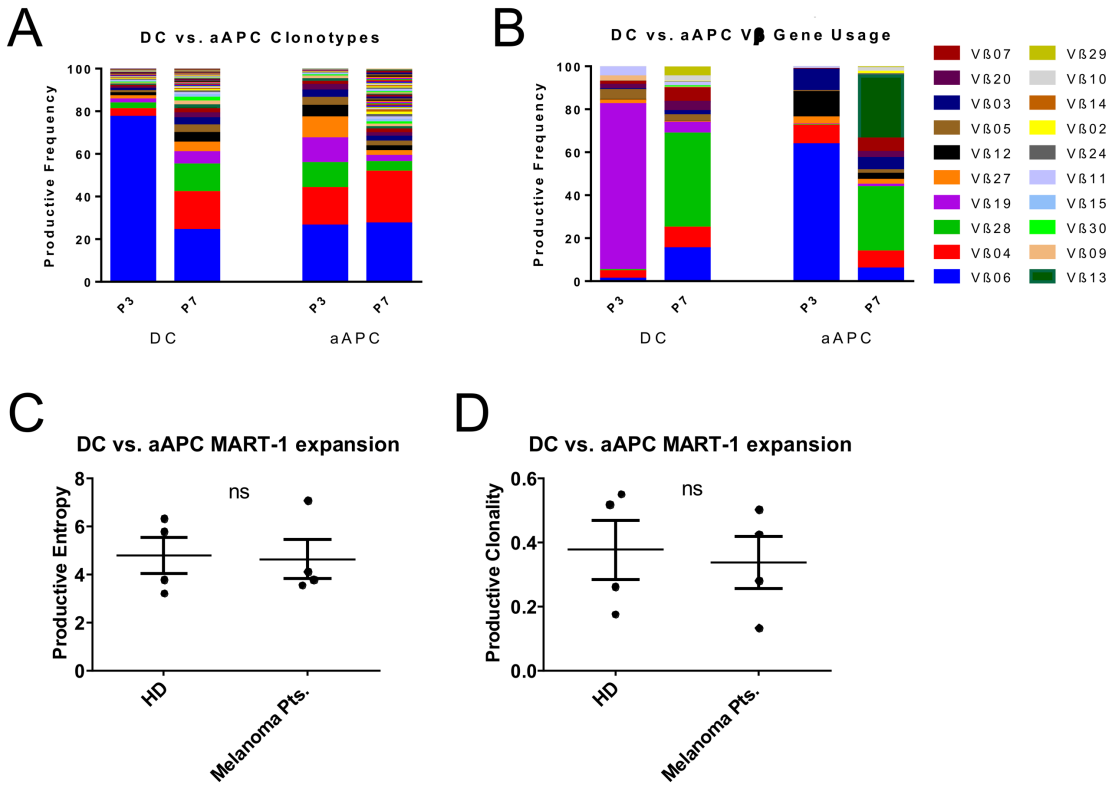

**Figure S8. TCR repertoire analysis of MART-1 Tet<sup>+</sup> CD8<sup>+</sup> T-cells.**

(A) Frequency of individual T cell clones ordered from highest to lowest frequency for DCs vs nano-aAPC MART-1 expanded samples. (B) Frequency of each V $\beta$  for paired nano-aAPC vs. mature DC-expanded MART-1 specific samples. (C) Productive Entropy of healthy donor vs. melanoma nano-aAPC MART-1 expansion (n=4, student's *t*-test, two-tailed). (D) Productive Clonality of healthy donor vs. melanoma aAPC MART-1 expansions (n=4, student's *t*-test, two-tailed).
